# Supplementary material
Source: PubMed Central journal article supplement (PMC10250359)
Supplement: 41431_2023_1291_MOESM1_ESM.pdf [file 41431_2023_1291_MOESM1_ESM.pdf]

Table S1. VCF file comparison of initial analysis and VExP reanalysis.

|                                          | Gene        | #CHROM | POS      | ID | REF | ALT        | QUAL    | FILTER | INFO                                                                                                                                                                                      | FORMAT         | Sample.Id                   |
|------------------------------------------|-------------|--------|----------|----|-----|------------|---------|--------|-------------------------------------------------------------------------------------------------------------------------------------------------------------------------------------------|----------------|-----------------------------|
| <b>VCF file from clinical sequencing</b> | <i>RYR1</i> | chr19  | 38985002 | .  | G   | GCGCTGGGCC | 2433.12 |        | *VQSRTTrancheINDEL99.90to100.0(RankSum=0.000;DP=322;ExcessHet=3.9794;FS=29.725;MLEAC=2;MLEAF=0.333;MQ=60.00;MQRankSum=0.000;QD=26.16;ReadPosRankSum=-2.521;SOR=                           | GT:AD:DP:GQ:PL | 0/1:27,9:36:99:1038,0,1260  |
| <b>VExP reanalysis VCF file</b>          |             | 19     | 38985002 | .  | G   | GCGCTGGGCC | 682.6   | PASS   | .270e-01;DP=99;ExcessHet=3.0103;FS=9.764;MLEAC=1;MLEAF=0.500;MQ=60.00;MQRankSum=0.00;QD=14.84;ReadPosRankSum=-4.833e+00;SOR=2.303;                                                        | GT:AD:DP:GQ:PL | 0/1:27,19:46:99:690,0,1094  |
| <b>VCF file from clinical sequencing</b> | <i>BBS1</i> | chr11  | 66293652 | .  | T   | G          | 2038.16 |        | *VQSRTTrancheSNP99.00to99.90 Sum=0.000;DP=278;ExcessHet=3.9794;FS=1.569;MLEAC=2;MLEAF=0.333;MQ=59.58;MQRankSum=-1.991;QD=11.71;ReadPosRankSum=-1.379;SOR=0.574                            | GT:AD:DP:GQ:PL | 0/1:44,45:89:99:1040,0,1682 |
| <b>VExP reanalysis VCF file</b>          |             | 11     | 66293652 | .  | T   | G          | 2138.49 | PASS   | kSum=1.97;DP=87;ExcessHet=3.1627;FS=4.430;InbreedingCoeff=-0.0714;MQ=60.00;MQRankSum=0.00;QD=12.43;ReadPosRankSum=0.408;SOR=0.449;VQ:AD:DP:GQ:PGT:PID:PL:99:1/0:66293645 CTCA_C:1098,0,16 |                |                             |

\* meas quality metrics failure.
