# Supplementary material
Source: PubMed Central journal article supplement (PMC10250359)
Supplement: 41431_2023_1291_MOESM2_ESM.pdf [file 41431_2023_1291_MOESM2_ESM.pdf]

**Table S2. List of the exome data reanalysis articles and outcome.**

| No.          | No. of undiagnosed exome case | No. of new diagnosis | No. of diagnosed dominant cases (include somatic variants) | Mitochondria variant | CNV | Digenic cases | No. of diagnosed AR cases | No. of homozygous | No. of hemizyous | No. of compound heterozygous | No. of identifying second one in compound heterozygous | Year | PMID     |
|--------------|-------------------------------|----------------------|------------------------------------------------------------|----------------------|-----|---------------|---------------------------|-------------------|------------------|------------------------------|--------------------------------------------------------|------|----------|
| 1            | 40                            | 4                    | 4                                                          | 0                    | 0   | 0             | 0                         | 0                 | 0                | 0                            | 0                                                      | 2017 | 27441994 |
| 2            | 74                            | 27                   | 13                                                         | 0                    | 0   | 2             | 12                        | 6                 | 0                | 6                            | 0                                                      | 2017 | 28327206 |
| 3            | 6                             | 5                    | 3                                                          | 0                    | 0   | 0             | 2                         | 0                 | 1                | 1                            | 0                                                      | 2017 | 27899421 |
| 4            | 33                            | 17                   | 0                                                          | 0                    | 0   | 0             | 17                        | 17                | 0                | 0                            | 0                                                      | 2017 | 27711071 |
| 5            | 127                           | 14                   | NA                                                         | NA                   | 16  | NA            | NA                        | NA                | NA               | NA                           | NA                                                     | 2018 | 29652076 |
| 6            | 26                            | 4                    | 3                                                          | 0                    | 0   | 0             | 1                         | 1                 | 0                | 0                            | 0                                                      | 2018 | 29595814 |
| 7            | 108                           | 10                   | 4                                                          | 0                    | 0   | 0             | 6                         | 5                 | 1                | 0                            | 0                                                      | 2018 | 29565419 |
| 8            | 156                           | 24                   | 13                                                         | 0                    | 1   | 0             | 10                        | 5                 | 1                | 4                            | 0                                                      | 2018 | 29095811 |
| 9            | 822                           | 182                  | NA                                                         | NA                   | 50  | NA            | NA                        | NA                | NA               | NA                           | NA                                                     | 2018 | 29323667 |
| 10           | 50                            | 6                    | 1                                                          | 0                    | 0   | 0             | 5                         | 4                 | 1                | 0                            | 0                                                      | 2018 | 30125339 |
| 11           | 1684                          | 290                  | NA                                                         | NA                   | 16  | NA            | NA                        | NA                | NA               | NA                           | 1                                                      | 2019 | 31216405 |
| 12           | 74                            | 6                    | 6                                                          | 0                    | 0   | 0             | 0                         | 0                 | 0                | 0                            | 0                                                      | 2019 | 30979967 |
| 13           | 139                           | 8                    | 8                                                          | 0                    | 0   | 0             | 0                         | 0                 | 0                | 0                            | 0                                                      | 2019 | 30951195 |
| 14           | 313                           | 48                   | 34                                                         | 0                    | 0   | 0             | 14                        | 9                 | 2                | 3                            | 0                                                      | 2019 | 31231135 |
| 15           | 76                            | 8                    | 7                                                          | 0                    | 0   | 0             | 1                         | 0                 | 0                | 1                            | 0                                                      | 2019 | 30904718 |
| 16           | 83                            | 4                    | 2                                                          | 0                    | 0   | 0             | 2                         | 0                 | 0                | 2                            | 0                                                      | 2019 | 31847883 |
| 17           | 84                            | 13                   | 9                                                          | 0                    | 0   | 0             | 4                         | 3                 | 0                | 1                            | 0                                                      | 2019 | 30377382 |
| 18           | 35                            | 9                    | 6                                                          | 0                    | 1   | 0             | 2                         | 1                 | 0                | 1                            | 0                                                      | 2019 | 29907797 |
| 19           | 2                             | 2                    | 0                                                          | 0                    | 0   | 0             | 2                         | 2                 | 0                | 0                            | 0                                                      | 2019 | 29709712 |
| 20           | 240                           | 38                   | 26                                                         | 0                    | 0   | 0             | 12                        | 9                 | 1                | 2                            | 0                                                      | 2019 | 30577886 |
| 21           | 101                           | 13                   | 8                                                          | 0                    | 0   | 0             | 5                         | 3                 | 1                | 1                            | 0                                                      | 2019 | 30665423 |
| 22           | 46                            | 12                   | 9                                                          | 0                    | 0   | 0             | 3                         | 1                 | 0                | 2                            | 1                                                      | 2020 | 32963807 |
| 23           | 145                           | 18                   | 16                                                         | 0                    | 0   | 0             | 2                         | 1                 | 0                | 1                            | 0                                                      | 2020 | 33303739 |
| 24           | 60                            | 5                    | 1                                                          | 1                    | 1   | 0             | 2                         | 1                 | 0                | 1                            | 0                                                      | 2020 | 31692161 |
| 25           | 58                            | 0                    | 0                                                          | 0                    | 0   | 0             | 0                         | 0                 | 0                | 0                            | 0                                                      | 2020 | 32969205 |
| 26           | 174                           | 14                   | 2                                                          | 0                    | 4   | 1             | 7                         | 3                 | 1                | 3                            | 1                                                      | 2021 | 34560057 |
| 27           | 80                            | 2                    | 0                                                          | 0                    | 0   | 0             | 2                         | 2                 | 0                | 0                            | 0                                                      | 2021 | 33619735 |
| 28           | 20                            | 3                    | 1                                                          | 0                    | 0   | 0             | 2                         | 0                 | 0                | 2                            | 0                                                      | 2021 | 34582790 |
| 29           | 39                            | 2                    | 2                                                          | 0                    | 0   | 0             | 0                         | 0                 | 0                | 0                            | 0                                                      | 2021 | 33962052 |
| 30           | 34**                          | 8                    | 8                                                          | 0                    | 0   | 0             | 0                         | 0                 | 0                | 0                            | 0                                                      | 2021 | 34673242 |
| 31           | 4411                          | 120                  | 69                                                         | 1                    | 0   | 0             | 50                        | 43                | 3                | 4                            | NA                                                     | 2021 | 34075210 |
| 32           | 80                            | 7                    | 6                                                          | 0                    | 0   | 0             | 1                         | 1                 | 0                | 0                            | 0                                                      | 2022 | 34906498 |
| 33           | 16243*                        | 119                  | 117                                                        | 0                    | 0   | 0             | 2                         | 1                 | 0                | 1                            | 0                                                      | 2022 | 34906496 |
| 34           | 103                           | 31                   | 23                                                         | 0                    | 0   | 0             | 8                         | 3                 | 3                | 2                            | 0                                                      | 2022 | 35710456 |
| 35           | 323***                        | 67                   | 23                                                         | 0                    | 0   | 0             | 44                        | 22                | 2                | 20                           | NA                                                     | 2022 | 35569879 |
| 36           | 150***                        | 48                   | 29                                                         | 2                    | 1   | 0             | 16                        | 9                 | 0                | 7                            | NA                                                     | 2022 | 34740920 |
| <b>Total</b> | <b>9489</b>                   | <b>1188</b>          |                                                            |                      |     |               | <b>181</b>                |                   |                  |                              | <b>3</b>                                               |      |          |

\*Undiagnosed exome number not clear; \*\*Undiagnosed exome and panel sequencing data; \*\*\*Undiagnosed exome, genome and panel sequencing data; NA: not available.
