# Supplementary material
Source: PubMed Central journal article supplement (PMC10250359)
Supplement: 41431_2023_1291_MOESM3_ESM.pdf [file 41431_2023_1291_MOESM3_ESM.pdf]

**Table S3. List of recessive cases with known disease-causing genes identified by reanalysis in other articles.**

| ID | Gene   | HGVS_g (GRCh37)                     | Variants                                       | Segregation | Variant identification | ACMG/AMP Codes        | Pathogenicity | Diagnosis (#OMIM)                                                                             | PMID     |
|----|--------|-------------------------------------|------------------------------------------------|-------------|------------------------|-----------------------|---------------|-----------------------------------------------------------------------------------------------|----------|
| 1  | PHGDH  | NC_000001.10:g.120284440G>A         | NM_006623.4:c.1129G>A,<br>(p.Gly377Ser)        | Unknown     | Reanalysis             | PM1, PP5, PM2,<br>PP3 | P             | Neu-Laxova syndrome 1<br>[#256520]; Phosphoglycerate<br>dehydrogenase deficiency              | 31216405 |
| 2  | SKIC2  | NC_000006.11:g.31931511G>A          | NM_006929.5:c.1647+1G>A                        | Maternal    | Initial finding        | PVS1, PM2             | LP            | Trichohepatoenteric syndrome 2<br>(#614602)                                                   | 32963807 |
|    |        | NC_000006.11:g.31931188A>G          | NM_006929.5:c.1404-2 A>G                       | Paternal    | Reanalysis             | PVS1, PM2             | LP            |                                                                                               |          |
| 3  | VAR1S1 | NC_000006.11:g.31747238G>A          | NM_006295.3:c.3364C>T,<br>(p.Arg1122Trp)       | Maternal    | Initial finding        | PP3, PM2, PM3         | VUS           | Neurodevelopmental disorder with<br>microcephaly, seizures, and<br>cortical atrophy (#617802) | 34560057 |
|    |        | NC_000006.11:g.31762906_31762925del | NM_006295.3:c.71_90del,<br>(p.Tyr24SerfsTer18) | Paternal    | Reanalysis             | PVS1, PM2, PP3        | P             |                                                                                               |          |

LP: likely pathogenic; P: pathogenic; VUS: variant of uncertain significance.
